# Supplementary material for: Characteristics of the Mycoplasma pneumoniae Epidemic from 2019 to 2020 in Korea: Macrolide Resistance and Co-Infection Trends
Source: MDPI journal article supplement (doi:10.3390/antibiotics12111623), 2023-11-13
Supplement: s1 [file s1]

**Supplementary Table S1. Distribution of sex data for HIRA from May 2017 to April 2022**

| Periods             | Total   | Male (%)         | Female (%)       |
|---------------------|---------|------------------|------------------|
| Total               | 224,830 | 106,141 (47.21%) | 118,689 (52.79%) |
| May 2017–April 2018 | 47,451  | 21,594 (45.51%)  | 25,857 (54.49%)  |
| May 2018–April 2019 | 51,533  | 23,991 (46.55%)  | 27,542 (53.45%)  |
| May 2019–April 2020 | 88,066  | 42,259 (47.99%)  | 45,807 (52.01%)  |
| May 2020–April 2021 | 17,056  | 8,417 (49.35%)   | 8,639 (50.65%)   |
| May 2021–April 2022 | 20,724  | 9,880 (47.67%)   | 10,844 (52.33%)  |

**Supplementary Table S2. Oligonucleotide primers and probes for real-time PCR to detect target pathogens and an internal control**

| Pathogen                  | Type           | Sequences (5'-3')                       |
|---------------------------|----------------|-----------------------------------------|
| <i>M. pneumoniae</i>      | F. primer      | GCCGTAACCTATAACGGTCCTAAG                |
|                           | R. primer      | CCTTTCGCATCAACAAGTCCTA                  |
|                           | 23S rRNA probe | Texas red-CGGTGAAATCCAGGTACGGGTGAA-BHQ2 |
|                           | A2063G probe   | FAM-ACGGGAAGACCTCGTGAA-MGBNFQ           |
|                           | A2064G probe   | VIC-CGTGGTCTCTCCGTCC- MGBNFQ            |
| Internal control<br>(HBB) | F. primer      | GGCATAAAAGTCAGGGCAGAIIIICTATTGCT        |
|                           | R. primer      | CCAACTTCATCCACGTTACCCIIICCACAGGG        |
|                           | probe          | Cy5-CCTGAGGAGAAGTCTGCCGTTACTGC-BHQ2     |

Characteristics of Taqman and minor groove binder (MGB) probes with respective quenchers. Taqman probes were labeled with BHQ at the 3' end (23S rRNA and internal control). Minor groove binder probes were labeled with MGBNFQ at the 3' end (A2063G and A2064). Abbreviations: F. primer, forward primer; R. primer, reverse primer; probe, fluorescently labeled primer; BHQ, black hole quencher; MGBNFQ, minor groove binder non-fluorescent quencher.
